# Supplementary material
Source: Springer Nature journal article supplement (https://www.springermedizin.de/resource/supplementary/12891_2007_382_MOESM5_ESM.pdf/9510942)
Supplement: MOESM5 [file 9510942]

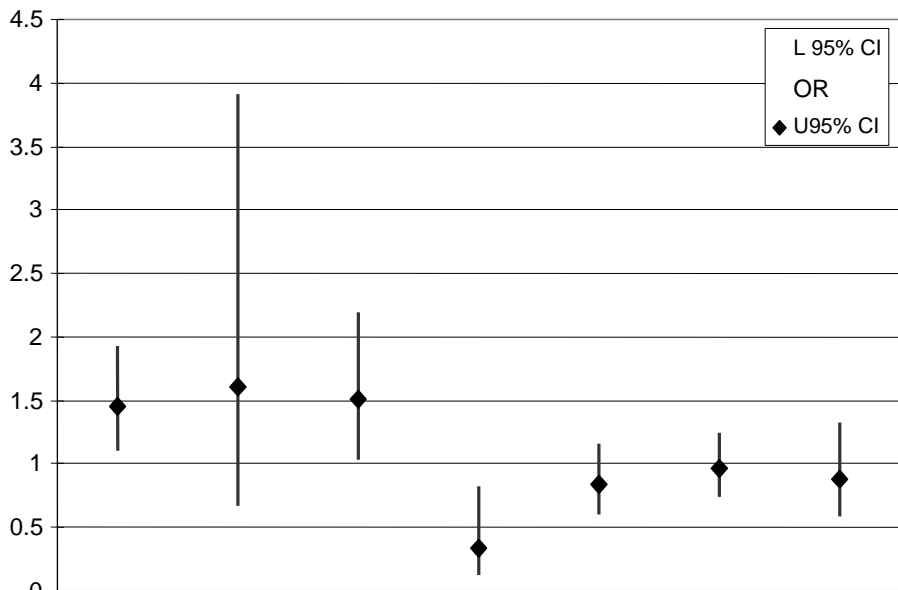

|           | Omokodion et al 2002 <sup>26</sup> | Igumbor et al 2003 <sup>31</sup> | Omokhodion et al 2004 <sup>16</sup> | Prista et al 2004 <sup>27</sup> | Bejia et al 2005 <sup>36</sup> | Jordaan et al 2005 <sup>28</sup> | Fabunmi et al 2005 <sup>41</sup> |
|-----------|------------------------------------|----------------------------------|-------------------------------------|---------------------------------|--------------------------------|----------------------------------|----------------------------------|
| L 95% CI  | 1.11                               | 0.67                             | 1.03                                | 0.13                            | 0.6                            | 0.74                             | 0.58                             |
| OR        | 1.93                               | 3.92                             | 2.2                                 | 0.82                            | 1.16                           | 1.24                             | 1.33                             |
| ◆ U95% CI | 1.46                               | 1.61                             | 1.51                                | 0.33                            | 0.84                           | 0.96                             | 0.88                             |
